# Supplementary material
Source: PubMed Central journal article supplement (PMC7498416)
Supplement: mmc1.pdf [file mmc1.pdf]

# THE LANCET

## Public Health

### **Supplementary appendix**

This appendix formed part of the original submission and has been peer reviewed. We post it as supplied by the authors.

Supplement to: Mesnier J, Cottin Y, Coste P, et al. Hospital admissions for acute myocardial infarction before and after lockdown according to regional prevalence of COVID-19 and patient profile in France: a registry study. *Lancet Public Health* 2020; published online Sept 17. [https://doi.org/10.1016/S2468-2667\(20\)30188-2](https://doi.org/10.1016/S2468-2667(20)30188-2).

## Hospital Admissions for Acute Myocardial Infarction before and after Lockdown according to Regional Prevalence of COVID-19 and Patient Profile in France: A registry study.

e-Table 1: Baseline characteristics and early management in patients admitted for STEMI before and after lockdown.

|                                                         | Before lockdown<br>N=331  | After lockdown<br>N=252     |
|---------------------------------------------------------|---------------------------|-----------------------------|
| Age (years) mean $\pm$ SD                               | 64.4 $\pm$ 13.6           | 63.4 $\pm$ 12.5             |
| Age (years), median [IQR]                               | 64 [53; 74]               | 63 [52; 72]                 |
| Sex (% women)                                           | 77 (23.3)                 | 62 (24.6)                   |
| <b>Regional prevalence of COVID-19 hospitalisations</b> |                           |                             |
| - > 30 / 10 <sup>5</sup> inhabitants                    | 123 (37.2)                | 98 (38.9)                   |
| - 15-29/10 <sup>5</sup> inhabitants                     | 138 (41.7)                | 108 (42.9)                  |
| - <15/ 10 <sup>5</sup> inhabitants                      | 70 (21.1)                 | 46 (18.3)                   |
| Hypertension (%)                                        | 139 (42.2)                | 116 (46.2)                  |
| Diabetes (%)                                            | 55 (16.6)                 | 35 (13.9)                   |
| Obesity (%)                                             | 63 (19.6)                 | 50 (20.7)                   |
| <b>Smoking status</b>                                   |                           |                             |
| - no smoking                                            | 131 (39.6)                | 110 (44.0)                  |
| - past smoking                                          | 69 (29.8)                 | 44 (17.6)                   |
| - current smoking                                       | 131 (39.6)                | 96 (38.1)                   |
| Any PCI during stay (%)                                 | 312 (94.3)                | 235 (93.6)                  |
| <b>Maximal Killip class</b>                             |                           |                             |
| - I                                                     | 257 (84.0)                | 177 (81.2)                  |
| - II                                                    | 23 (7.5)                  | 21 (9.6)                    |
| - III                                                   | 7 (2.3)                   | 7 (3.2)                     |
| - IV                                                    | 19 (6.2)                  | 13 (6.0)                    |
| - missing                                               | 25 (7.6)                  | 34 (13.5)                   |
| Duration of ICCU stay (days) mean $\pm$ SD              | 3.7 $\pm$ 3.0             | 3.7 $\pm$ 2.4               |
| Duration of ICCU stay (days) median [IQR]               | 3 [2.00; 4.00]<br>(n=303) | 3 [ 2.25]; 4.75]<br>(n=232) |
| In-hospital death                                       | 14 (4.2)                  | 16 (6.3)                    |

Abbreviations: ICCU: intensive cardiac care unit, IQR: interquartile range, PCI: percutaneous coronary intervention, SD standard deviation, STEMI: ST segment elevation myocardial infarction

**e-Table 2: Baseline characteristics and early management in patients admitted for NSTEMI before and after lockdown.**

|                                                              | <b>Before lockdown<br/>N=355</b> | <b>After lockdown<br/>N=229</b> |
|--------------------------------------------------------------|----------------------------------|---------------------------------|
| <b>Age (years), mean <math>\pm</math> SD</b>                 | 67.0 $\pm$ 13.5                  | 67.2 $\pm$ 12.7                 |
| <b>Age (years), median [IQR]</b>                             | 67 [57; 77]                      | 68 [58; 76]                     |
| <b>Sex (% women)</b>                                         | 100 (28.2)                       | 62 (27.1)                       |
| <b>Regional prevalence of COVID-19 hospitalisations</b>      |                                  |                                 |
| - > 30 / 10 <sup>5</sup> inhabitants                         | 156 (43.9)                       | 82 (35.8)                       |
| - 15-29/10 <sup>5</sup> inhabitants                          | 129 (36.3)                       | 96 (41.9)                       |
| - <15/ 10 <sup>5</sup> inhabitants                           | 70 (19.7)                        | 51 (22.3)                       |
| <b>Hypertension (%)</b>                                      | 211 (59.4)                       | 131 (58.0)                      |
| <b>Diabetes (%)</b>                                          | 94 (26.6)                        | 61 (27.0)                       |
| <b>Obesity (%)</b>                                           | 88 (25.3)                        | 55 (24.9)                       |
| <b>Smoking status</b>                                        |                                  |                                 |
| - no smoking                                                 | 161 (45.5)                       | 105 (46.7)                      |
| - past smoking                                               | 94 (26.6)                        | 56 (24.9)                       |
| - current smoking                                            | 99 (28.0)                        | 64 (28.4)                       |
| <b>Any PCI during stay (%)</b>                               | 255 (71.8)                       | 166 (74.4)                      |
| <b>Maximal Killip class</b>                                  |                                  |                                 |
| - I                                                          | 286 (85.6)                       | 167 (82.7)                      |
| - II                                                         | 26 (7.8)                         | 16 (7.9)                        |
| - III                                                        | 12 (3.6)                         | 10 (5.0)                        |
| - IV                                                         | 10 (3.0)                         | 9 (4.5)                         |
| - missing                                                    | 21 (5.9)                         | 27 (11.8)                       |
| <b>Duration of ICCU stay (days) mean <math>\pm</math> SD</b> | 2.7 $\pm$ 2.6                    | 3.0 $\pm$ 2.4                   |
| <b>Duration of ICCU stay (days) median [IQR]</b>             | 2 [1.00; 3.00]<br>(n=339)        | 2 [2.00; 4.00]<br>(n=208)       |
| <b>In-hospital death</b>                                     | 9 (2.5)                          | 9 (3.9)                         |

Abbreviations: ICCU: intensive cardiac care unit, IQR: interquartile range, NSTEMI: non-ST segment elevation myocardial infarction, PCI: percutaneous coronary intervention, SD standard deviation,

**e-Figure 1: Participating centres according to local prevalence of COVID-19 (Red = high, orange = intermediate, green = low).**

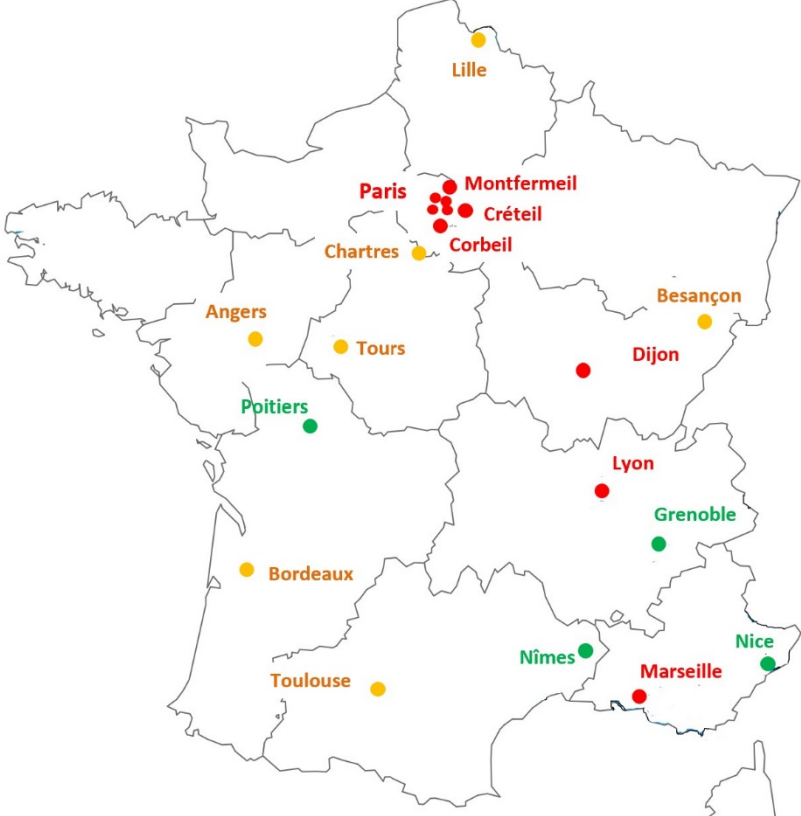

**e-Figure 2: Number of daily admissions for AMI from February 17, 2020 to April 12, 2020 at the participating institutions in the total population of the registry and according to regional prevalence of COVID-19 (high, intermediate, or low prevalence).**

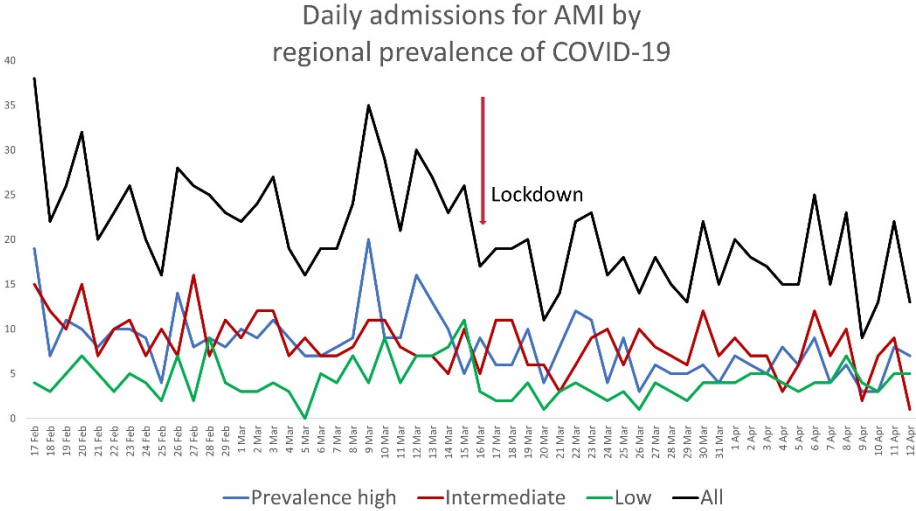

**Appendix: STROBE checklist (NA= not applicable)**

STROBE Statement—Checklist of items that should be included in reports of *cohort studies*

|                              | <b>Item No</b> | <b>Recommendation</b>                                                                                                                                                                | <b>Check</b>      |
|------------------------------|----------------|--------------------------------------------------------------------------------------------------------------------------------------------------------------------------------------|-------------------|
| <b>Title and abstract</b>    | 1              | (a) Indicate the study's design with a commonly used term in the title or the abstract                                                                                               | OK                |
|                              |                | (b) Provide in the abstract an informative and balanced summary of what was done and what was found                                                                                  | OK                |
| <b>Introduction</b>          |                |                                                                                                                                                                                      |                   |
| Background/rationale         | 2              | Explain the scientific background and rationale for the investigation being reported                                                                                                 | OK, page 5        |
| Objectives                   | 3              | State specific objectives, including any prespecified hypotheses                                                                                                                     | OK, page 5        |
| <b>Methods</b>               |                |                                                                                                                                                                                      |                   |
| Study design                 | 4              | Present key elements of study design early in the paper                                                                                                                              | OK, page 5        |
| Setting                      | 5              | Describe the setting, locations, and relevant dates, including periods of recruitment, exposure, follow-up, and data collection                                                      | OK, page 5        |
| Participants                 | 6              | (a) Give the eligibility criteria, and the sources and methods of selection of participants. Describe methods of follow-up                                                           | OK, page 5        |
|                              |                | (b) For matched studies, give matching criteria and number of exposed and unexposed                                                                                                  | NA                |
| Variables                    | 7              | Clearly define all outcomes, exposures, predictors, potential confounders, and effect modifiers. Give diagnostic criteria, if applicable                                             | OK, pages 5 and 6 |
| Data sources/<br>measurement | 8*             | For each variable of interest, give sources of data and details of methods of assessment (measurement). Describe comparability of assessment methods if there is more than one group | NA                |
| Bias                         | 9              | Describe any efforts to address potential sources of bias                                                                                                                            | OK, page 6        |
| Study size                   | 10             | Explain how the study size was arrived at                                                                                                                                            | NA                |
| Quantitative variables       | 11             | Explain how quantitative variables were handled in the analyses. If applicable, describe which groupings were chosen and why                                                         | OK, page 6        |
| Statistical methods          | 12             | (a) Describe all statistical methods, including those used to control for confounding                                                                                                | OK, page 6        |
|                              |                | (b) Describe any methods used to examine subgroups and interactions                                                                                                                  | OK, pages 5 and 6 |
|                              |                | (c) Explain how missing data were addressed                                                                                                                                          | OK, page 6        |
|                              |                | (d) If applicable, explain how loss to follow-up was addressed                                                                                                                       | NA                |
|                              |                | (e) Describe any sensitivity analyses                                                                                                                                                | NA                |
| <b>Results</b>               |                |                                                                                                                                                                                      |                   |
| Participants                 | 13*            | (a) Report numbers of individuals at each stage of study—eg numbers potentially eligible, examined for eligibility, confirmed                                                        | OK, page 6        |

|                          |     |                                                                                                                                                                                                              |                                |
|--------------------------|-----|--------------------------------------------------------------------------------------------------------------------------------------------------------------------------------------------------------------|--------------------------------|
|                          |     | eligible, included in the study, completing follow-up, and analysed                                                                                                                                          |                                |
|                          |     | (b) Give reasons for non-participation at each stage                                                                                                                                                         | NA                             |
|                          |     | (c) Consider use of a flow diagram                                                                                                                                                                           | NA                             |
| Descriptive data         | 14* | (a) Give characteristics of study participants (eg demographic, clinical, social) and information on exposures and potential confounders                                                                     | OK, Table 1                    |
|                          |     | (b) Indicate number of participants with missing data for each variable of interest                                                                                                                          | OK, Table 1                    |
|                          |     | (c) Summarise follow-up time (eg, average and total amount)                                                                                                                                                  | NA                             |
| Outcome data             | 15* | Report numbers of outcome events or summary measures over time                                                                                                                                               | OK, pages 6 and 7, Fig 2       |
| Main results             | 16  | (a) Give unadjusted estimates and, if applicable, confounder-adjusted estimates and their precision (eg, 95% confidence interval). Make clear which confounders were adjusted for and why they were included | OK, pages 6 and 7, Fig 1 and 3 |
|                          |     | (b) Report category boundaries when continuous variables were categorized                                                                                                                                    | OK, Table 1                    |
|                          |     | (c) If relevant, consider translating estimates of relative risk into absolute risk for a meaningful time period                                                                                             | NA                             |
| Other analyses           | 17  | Report other analyses done—eg analyses of subgroups and interactions, and sensitivity analyses                                                                                                               | OK, page 7, Fig 3              |
| <b>Discussion</b>        |     |                                                                                                                                                                                                              |                                |
| Key results              | 18  | Summarise key results with reference to study objectives                                                                                                                                                     | OK, page 7                     |
| Limitations              | 19  | Discuss limitations of the study, taking into account sources of potential bias or imprecision. Discuss both direction and magnitude of any potential bias                                                   | OK, page 8                     |
| Interpretation           | 20  | Give a cautious overall interpretation of results considering objectives, limitations, multiplicity of analyses, results from similar studies, and other relevant evidence                                   | OK, page 8                     |
| Generalisability         | 21  | Discuss the generalisability (external validity) of the study results                                                                                                                                        | OK, page 8                     |
| <b>Other information</b> |     |                                                                                                                                                                                                              |                                |
| Funding                  | 22  | Give the source of funding and the role of the funders for the present study and, if applicable, for the original study on which the present article is based                                                | OK, page 6                     |

\*Give information separately for exposed and unexposed groups.
